# Supplementary material for: Design of efficient dye-sensitized solar cells with patterned ZnO–ZnS core–shell nanowire array photoanodes
Source: Royal Society of Chemistry journal article supplement (doi:10.1039/c4nr00137k), 2014-01-01
Supplement: c4nr00137k1.pdf [file c4nr00137k1.pdf]

## Electronic Supplementary Information

### **Design of efficient dye-sensitized solar cells with patterned ZnO-ZnS core-shell nanowire arrays photoanodes**

Xiang Chen,<sup>‡a</sup> Zhiming Bai,<sup>‡a</sup> Xiaoqin Yan,<sup>a</sup> Haoge Yuan,<sup>a</sup> Guangjie Zhang,<sup>a</sup> Pei Lin,<sup>a</sup>  
Zheng Zhang,<sup>a</sup> Yichong Liu<sup>a</sup> and Yue Zhang<sup>\*ab</sup>

<sup>a</sup>State Key Laboratory for Advanced Metals and Materials, School of Materials Science and  
Engineering, University of Science and Technology Beijing, Beijing 100083, China

<sup>b</sup>Key Laboratory of New Energy Materials and Technologies, University of Science and  
Technology Beijing, Beijing 100083, China

<sup>‡</sup>These authors contributed equally to this work.

\*E-mail: yuezhang@ustb.edu.cn

#### **Contents:**

Supplementary Figure S1-S2

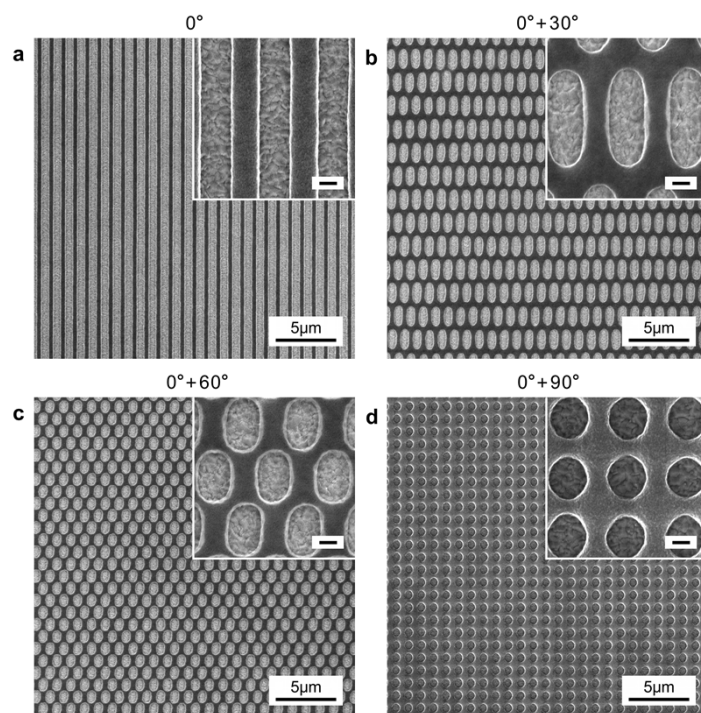

**Fig. S1** Top view SEM images of the PR templates with (a) line, (b) long hexagonal, (c) hexagonal and (d) square symmetries, fabricated by using four exposure modes, including  $0^\circ$ ,  $0^\circ+30^\circ$ ,  $0^\circ+60^\circ$  and  $0^\circ+90^\circ$ , respectively. Insets show the corresponding magnified SEM images, scale bars are 300 nm.

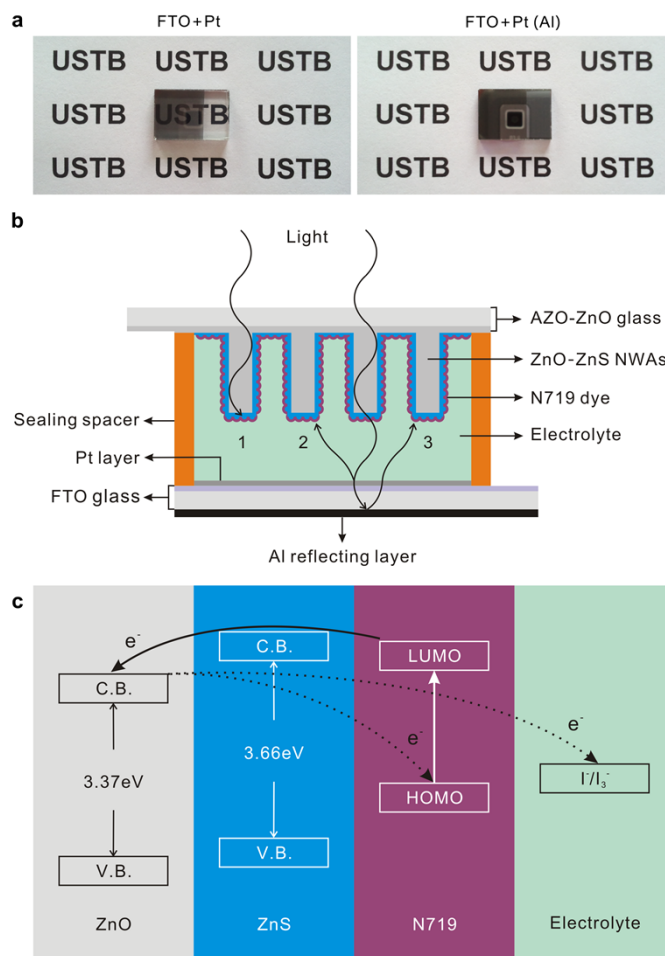

**Fig. S2** (a) Optical images of the FTO-Pt cathodes with or without Al reflecting layer. (b) Schematic illustration of the presented DSSCs and light transport path. (c) Energy level diagram for the ZnO-ZnS core-shell NWAs with N719 dye in electrolyte.
